# Supplementary material
Source: publisher figshare collection journal article supplement (https://acs.figshare.com/ndownloader/files/4204789)
Supplement: Supplementary file 1 [file 4204789]

# Supporting Information for “Importance of Ionic Polarization Effect on the Electrophoretic Behavior of Polyelectrolyte Nanoparticles in Aqueous Electrolyte Solutions”

Li-Hsien Yeh\*, Kuan-Liang Liu, and Jyh-Ping Hsu\*

Department of Chemical Engineering, National Taiwan University, Taipei, Taiwan 10617

\* Corresponding author

---

## Superposition Methodology

Due to the linear nature of the set of governing equations for the perturbed problem, the problem considered here can be decomposed into two hypothetical sub-problems.<sup>R1</sup> In the first sub-problem the particle moves with a constant scaled velocity  $U^*$  in the absence of applied electric field  $\mathbf{E}$ , and in the second sub-problem  $\mathbf{E}$  is applied but the particle is held fixed. To determine the electrophoretic mobility of the polyelectrolyte, both the electrical force  $\mathbf{F}_e$  and hydrodynamic force  $\mathbf{F}_h$  acting on it need be calculated. Let  $F_{ei}$  and  $F_{hi}$  be, respectively, the components of  $\mathbf{F}_e$  and  $\mathbf{F}_h$  in the direction of  $\mathbf{E}$  in sub-problem  $i$ ,  $F_{ei}^* = F_{ei} / \varepsilon(\phi_r)^2$  and  $F_{hi}^* = F_{hi} / \varepsilon(\phi_r)^2$  be the corresponding scaled quantities, and  $F_i^* = F_{ei}^* + F_{hi}^*$  be the scaled magnitude of total force acting on the

polyelectrolyte in the direction of  $\mathbf{E}$  in sub-problem  $i$ . Then  $F_1^* = C_1 U^*$  and  $F_2^* = C_2 E^*$ , where the proportional constants  $C_1$  and  $C_2$  are independent of  $U^*$  and  $E^*$ , respectively. At steady state,  $F_1^* + F_2^* = 0$ , yielding<sup>R2</sup>

$$\mu^* = \frac{U^*}{E^*} = -\frac{C_2}{C_1} \quad (\text{S1})$$

where  $\mu^*$  is the scaled electrophoretic mobility of the polyelectrolyte.  $F_{ei}$  and  $F_{di}$  can be evaluated by integrating the Maxwell stress tensor  $\boldsymbol{\sigma}^E = \varepsilon \mathbf{E} \mathbf{E} - (1/2) \varepsilon E^2 \mathbf{I}$  and the hydrodynamic stress tensor  $\boldsymbol{\sigma}^H = -\delta p \mathbf{I} + 2\eta \boldsymbol{\Lambda}$ , respectively, over  $\Omega_p$  in sub-problem  $i$ , where  $E^2 = \mathbf{E} \cdot \mathbf{E}$  with  $\mathbf{I}$ ,  $\boldsymbol{\Lambda} = [\nabla \mathbf{u} + (\nabla \mathbf{u})^T]/2$ , and the superscript  $\mathbf{T}$  being the unit tensor, the rate of deformation tensor, and matrix transpose, respectively, as<sup>R2,R3</sup>

$$F_{ei}^* = \iint_{\Omega_p^*} \left( \left[ \frac{\partial \phi_e^*}{\partial n} \frac{\partial \delta \phi^*}{\partial Z} + \frac{\partial \delta \phi^*}{\partial n} \frac{\partial \phi_e^*}{\partial Z} \right] - \left[ \frac{\partial \phi_e^*}{\partial n} \frac{\partial \delta \phi^*}{\partial n} + \frac{\partial \phi_e^*}{\partial t} \frac{\partial \delta \phi^*}{\partial t} \right] n_z \right) d\Omega_p^*, \quad i=1,2 \quad (\text{S2})$$

$$F_{hi}^* = \iint_{\Omega_p^*} (\boldsymbol{\sigma}^{H^*} \cdot \mathbf{n}) \cdot \mathbf{e}_z d\Omega_p^*, \quad i=1,2 \quad (\text{S3})$$

In these expressions,  $Z = z/a$ ;  $\Omega_p^* = \Omega_p/a^2$ ,  $\boldsymbol{\sigma}^{E^*} = \boldsymbol{\sigma}^E / [\varepsilon(\phi_r)^2/a^2]$ , and  $\boldsymbol{\sigma}^{H^*} = \boldsymbol{\sigma}^H / [\varepsilon(\phi_r)^2/a^2]$  are the scaled  $\Omega_p$ , the scaled Maxwell tensor, and the scaled hydrodynamic stress tensor, respectively;  $n_z$ ,  $n$ , and  $t$  are the  $z$  components of the unit

normal vector  $\mathbf{n}$ , the magnitude of  $\mathbf{n}$ , and that of the unit tangential vector  $\mathbf{t}$ , respectively.

Because  $F_{h2}^*$  always acts against the motion of the polyelectrolyte, it is usually called the scaled electroosmotic retardation force,<sup>R2</sup> which is dominated by an electroosmotic flow coming mainly from the motion of the counterions inside the double layer due to the application of  $\mathbf{E}$ .

Note that in sub-problem one,  $U^* \neq 0$  and  $E^* = 0$ , and in sub-problem two,  $U^* = 0$  and  $E^* \neq 0$ . For a given  $E^*$ , the solution procedure includes the following steps.<sup>R2</sup> (i) Assume an arbitrary value of  $U^*$  in sub-problem one and that of  $E^*$  in sub-problem two, and solve eqs 2-6 in the text subject to appropriate boundary conditions. (ii) Calculate  $F_{ei}^*$  and  $F_{hi}^*$  by eqs S2 and S3, respectively, and evaluate  $F_i^* = F_{ei}^* + F_{hi}^*$ ,  $i=1,2$ . (iii) Use  $F_1^* = C_1 U^*$  and  $F_2^* = C_2 E^*$  to calculate  $C_1$  and  $C_2$ . (iv) Apply eq S1 to evaluate  $\mu^*$ . Note that if we initially let  $U^* = E^*$ , then  $\mu^*$  can also be evaluated directly by  $-(F_2^* / F_1^*)$ .

## REFERENCES

(R1) O'Brien, R. W.; White, L. R. *J. Chem. Soc. Faraday Trans. 2* **1978**, *74*, 1607.

(R2) Yeh, L. H.; Hsu, J. P. *Soft Matter* **2011**, *7*, 396.

(R3) Hsu, J. P.; Yeh, L. H.; Ku, M. H. *J. Colloid Interface Sci.* **2007**, *305*, 324.
